# Supplementary material for: Childcare Correlates of Physical Activity, Sedentary Behavior, and Adiposity in Preschool Children: A Cross-Sectional Analysis of the SPLASHY Study
Source: Hindawi journal article supplement (doi:10.1155/2018/9157194), 2018-11-11
Supplement: f1 [file 9157194.f1.pdf]

Table 5. Associations of childcare correlates with physical activity and sedentary behavior using Lasso.

a) PA during childcare days (full-day attendance)

| Outcome                  | Predictors                            | Mean-lasso coefficient | SD          | Number of selection |
|--------------------------|---------------------------------------|------------------------|-------------|---------------------|
| Total PA                 | <b>Age*</b>                           | <b>0.20</b>            | <b>0.02</b> | <b>50</b>           |
|                          | <b>Sex*</b>                           | <b>-0.15</b>           | <b>0.02</b> | <b>50</b>           |
|                          | <b>Mixing ages within a CC group*</b> | <b>0.13</b>            | <b>0.05</b> | <b>50</b>           |
|                          | <b>Written PA policy*</b>             | <b>0.11</b>            | <b>0.03</b> | <b>50</b>           |
|                          | <b>Child-initiated interaction*</b>   | <b>0.10</b>            | <b>0.04</b> | <b>50</b>           |
|                          | PA indoor space                       | 0.04                   | 0.02        | 47                  |
|                          | Parental PA involvement               | -0.04                  | 0.03        | 47                  |
|                          | Staff PA training                     | -0.04                  | 0.03        | 46                  |
|                          | CC attendance                         | -0.04                  | 0.03        | 46                  |
|                          | CC surface                            | 0.04                   | 0.03        | 38                  |
|                          | Sociocultural region                  | 0.03                   | 0.04        | 37                  |
|                          | Daily Structured PA                   | -0.03                  | 0.03        | 32                  |
|                          | Playing peers                         | 0.03                   | 0.03        | 31                  |
|                          | PA outdoor space                      | -0.02                  | 0.02        | 33                  |
|                          | Staff support                         | -0.02                  | 0.03        | 29                  |
|                          | Daily PA                              | -0.02                  | 0.03        | 22                  |
|                          | Mobile PA equipment                   | 0.02                   | 0.03        | 16                  |
|                          | CC SES                                | -0.01                  | 0.02        | 29                  |
|                          | Fixed PA equipment                    | -0.01                  | 0.02        | 28                  |
|                          | CC rural urban                        | 0.01                   | 0.02        | 28                  |
| Staff PA participation   | 0.01                                  | 0.02                   | 21          |                     |
| Moderate-and-vigorous PA | <b>Age*</b>                           | <b>0.28</b>            | <b>0.02</b> | <b>50</b>           |
|                          | <b>Sex*</b>                           | <b>-0.18</b>           | <b>0.02</b> | <b>50</b>           |
|                          | <b>Mixing ages within a CC group*</b> | <b>0.11</b>            | <b>0.05</b> | <b>49</b>           |
|                          | <b>Child-initiated interaction*</b>   | <b>0.10</b>            | <b>0.04</b> | <b>49</b>           |
|                          | <b>Written PA policy*</b>             | <b>0.08</b>            | <b>0.03</b> | <b>49</b>           |
|                          | Staff PA training                     | -0.03                  | 0.02        | 38                  |
|                          | PA indoor space                       | 0.03                   | 0.03        | 38                  |
|                          | CC surface                            | 0.03                   | 0.03        | 36                  |
|                          | Fixed PA equipment                    | -0.03                  | 0.03        | 36                  |
|                          | Daily structured PA                   | -0.03                  | 0.03        | 33                  |
|                          | Playing peers                         | 0.03                   | 0.04        | 29                  |
|                          | Daily PA                              | -0.03                  | 0.03        | 28                  |
|                          | Mobile PA equipment                   | 0.02                   | 0.04        | 17                  |
|                          | Parental PA involvement               | -0.01                  | 0.02        | 25                  |
|                          | CC attendance                         | -0.01                  | 0.02        | 25                  |
|                          | PA outdoor space                      | -0.01                  | 0.02        | 22                  |
|                          | Staff PA participation                | 0.01                   | 0.02        | 21                  |
|                          | Sociocultural region                  | 0.01                   | 0.01        | 19                  |
|                          | CC rural urban                        | 0.01                   | 0.02        | 19                  |
|                          | CC SES                                | 0.01                   | 0.02        | 15                  |
| Staff support            | 0.00                                  | 0.01                   | 11          |                     |
| Sedentary time           | <b>Mixing ages within a CC group*</b> | <b>-0.14</b>           | <b>0.05</b> | <b>50</b>           |
|                          | <b>Written PA policy*</b>             | <b>-0.14</b>           | <b>0.04</b> | <b>50</b>           |
|                          | Parental PA involvement               | 0.10                   | 0.03        | 49                  |
|                          | <b>Child-initiated interaction*</b>   | <b>-0.09</b>           | <b>0.04</b> | <b>50</b>           |
|                          | Sex                                   | 0.09                   | 0.02        | 50                  |
|                          | CC surface                            | -0.06                  | 0.03        | 46                  |
|                          | Sociocultural region                  | -0.06                  | 0.04        | 45                  |
|                          | Staff PA training                     | 0.05                   | 0.03        | 46                  |
|                          | CC attendance                         | 0.05                   | 0.04        | 45                  |
|                          | CC SES                                | 0.04                   | 0.03        | 45                  |
|                          | Staff support                         | 0.04                   | 0.04        | 38                  |
|                          | PA indoor space                       | -0.03                  | 0.02        | 40                  |
|                          | CC rural urban                        | -0.03                  | 0.03        | 38                  |
| Daily structured PA      | 0.03                                  | 0.03                   | 34          |                     |

|                        |       |      |    |
|------------------------|-------|------|----|
| Age                    | -0.02 | 0.02 | 50 |
| PA outdoor space       | 0.02  | 0.02 | 37 |
| Playing peers          | -0.02 | 0.03 | 26 |
| Daily PA               | 0.02  | 0.03 | 22 |
| Mobile PA equipment    | -0.01 | 0.02 | 18 |
| Fixed PA equipment     | 0.00  | 0.02 | 24 |
| Staff PA participation | 0.00  | 0.01 | 12 |

PA= physical activity; SD= standard error; CC= childcare.

\* Significant in the regression model

All outcomes and predictors are standardized. The model always included age and sex.

b) Overall PA (all days, both home and childcare days)

| Outcome                  | Predictors                            | Mean-lasso coefficient | SD          | Number of selection |
|--------------------------|---------------------------------------|------------------------|-------------|---------------------|
| Total PA                 | <b>Age*</b>                           | <b>0.27</b>            | <b>0.01</b> | <b>50</b>           |
|                          | <b>Sex*</b>                           | <b>-0.18</b>           | <b>0.01</b> | <b>50</b>           |
|                          | <b>Mixing ages within a CC group*</b> | <b>0.09</b>            | <b>0.03</b> | <b>50</b>           |
|                          | CC surface                            | 0.06                   | 0.03        | 49                  |
|                          | Staff PA training                     | -0.06                  | 0.03        | 49                  |
|                          | <b>Child-initiated interaction *</b>  | <b>0.06</b>            | <b>0.03</b> | <b>46</b>           |
|                          | CC attendance                         | -0.05                  | 0.04        | 43                  |
|                          | Parental PA involvement               | -0.04                  | 0.02        | 49                  |
|                          | Sociocultural region                  | 0.02                   | 0.02        | 35                  |
|                          | CC rural urban                        | 0.02                   | 0.02        | 34                  |
|                          | Written PA policy                     | 0.02                   | 0.02        | 32                  |
|                          | Staff PA participation                | 0.01                   | 0.02        | 21                  |
|                          | PA indoor space                       | 0.01                   | 0.02        | 18                  |
|                          | Fixed PA equipment                    | 0.00                   | 0.01        | 13                  |
|                          | Mobile PA equipment                   | 0.00                   | 0.02        | 10                  |
|                          | CC SES                                | 0.00                   | 0.01        | 9                   |
|                          | Playing peers                         | 0.00                   | 0.01        | 8                   |
|                          | Staff support                         | 0.00                   | 0.01        | 6                   |
|                          | Daily PA                              | 0.00                   | 0.01        | 6                   |
|                          | PA outdoor space                      | 0.00                   | 0.00        | 6                   |
| Daily structured PA      | 0.00                                  | 0.01                   | 5           |                     |
| Moderate-and-vigorous PA | <b>Age*</b>                           | <b>0.32</b>            | <b>0.02</b> | <b>50</b>           |
|                          | <b>Sex*</b>                           | <b>-0.24</b>           | <b>0.01</b> | <b>50</b>           |
|                          | <b>Mixing ages within a CC group*</b> | <b>0.12</b>            | <b>0.04</b> | <b>50</b>           |
|                          | <b>Child-initiated interaction*</b>   | <b>0.09</b>            | <b>0.03</b> | <b>50</b>           |
|                          | <b>CC surface*</b>                    | <b>0.07</b>            | <b>0.03</b> | <b>50</b>           |
|                          | Staff PA training                     | -0.06                  | 0.02        | 49                  |
|                          | CC rural urban                        | 0.05                   | 0.02        | 46                  |
|                          | Fixed PA equipment                    | -0.04                  | 0.03        | 46                  |
|                          | CC SES                                | 0.04                   | 0.03        | 44                  |
|                          | Playing peers                         | 0.04                   | 0.03        | 38                  |
|                          | Mobile PA equipment                   | 0.04                   | 0.04        | 30                  |
|                          | Parental PA involvement               | -0.03                  | 0.02        | 43                  |
|                          | Written PA policy                     | 0.03                   | 0.02        | 43                  |
|                          | CC attendance                         | -0.03                  | 0.03        | 35                  |
|                          | Staff PA participation                | 0.01                   | 0.02        | 26                  |
|                          | Daily PA                              | -0.01                  | 0.02        | 24                  |
|                          | Daily structured PA                   | -0.01                  | 0.02        | 24                  |
|                          | PA outdoor space                      | 0.00                   | 0.01        | 20                  |
|                          | Staff support                         | 0.00                   | 0.01        | 15                  |
|                          | PA indoor space                       | 0.00                   | 0.01        | 16                  |
| Sociocultural region     | 0.00                                  | 0.02                   | 5           |                     |
| Sedentary time           | Sociocultural region                  | -0.11                  | 0.03        | 50                  |
|                          | <b>Parental PA involvement*</b>       | <b>0.11</b>            | <b>0.02</b> | <b>50</b>           |
|                          | <b>Sex*</b>                           | <b>0.09</b>            | <b>0.01</b> | <b>50</b>           |
|                          | <b>Child-initiated interaction*</b>   | <b>-0.09</b>           | <b>0.03</b> | <b>49</b>           |
|                          | CC surface                            | -0.07                  | 0.03        | 48                  |
| CC rural urban           | -0.06                                 | 0.03                   | 49          |                     |

|                               |       |      |    |
|-------------------------------|-------|------|----|
| Written PA policy             | -0.06 | 0.03 | 48 |
| CC attendance                 | 0.05  | 0.04 | 44 |
| Staff PA training             | 0.04  | 0.02 | 46 |
| Mixing ages within a CC group | -0.04 | 0.03 | 44 |
| Age                           | -0.02 | 0.01 | 50 |
| PA indoor space               | -0.02 | 0.02 | 35 |
| Mobile PA equipment           | 0.01  | 0.01 | 18 |
| CC SES                        | 0.00  | 0.00 | 7  |
| Daily PA                      | 0.00  | 0.01 | 7  |
| Playing peers                 | 0.00  | 0.01 | 11 |
| Staff PA participation        | 0.00  | 0.01 | 13 |
| Fixed PA equipment            | 0.00  | 0.01 | 9  |
| Staff support                 | 0.00  | 0.00 | 5  |
| Daily structured PA           | 0.00  | 0.01 | 11 |
| PA outdoor space              | 0.00  | 0.00 | 6  |

PA= physical activity; SD= standard error; CC= childcare.

\* Significant in the regression model.

All outcomes and predictors are standardized. The model always included age and sex.

Table 6. Associations of childcare correlates with body composition using Lasso.

| Outcome                | Predictors                    | Mean-lasso coefficient | SD          | Number of selection |
|------------------------|-------------------------------|------------------------|-------------|---------------------|
| BMI                    | <b>Age*</b>                   | <b>-0.15</b>           | <b>0.01</b> | <b>50</b>           |
|                        | Sociocultural region          | 0.03                   | 0.02        | 47                  |
|                        | Sex                           | -0.02                  | 0.01        | 50                  |
|                        | Mixing ages within a CC group | 0.01                   | 0.02        | 29                  |
|                        | Leaving food on the plate     | -0.01                  | 0.02        | 15                  |
|                        | Staff food encouragement      | 0.01                   | 0.01        | 8                   |
|                        | CC surface                    | 0.00                   | 0.01        | 14                  |
|                        | Clean plate                   | 0.00                   | 0.01        | 10                  |
|                        | Daily structured PA           | 0.00                   | 0.01        | 8                   |
|                        | Staff nutrition training      | 0.00                   | 0.01        | 7                   |
|                        | Playing peers                 | 0.00                   | 0.01        | 6                   |
|                        | Using food as reward          | 0.00                   | 0.01        | 4                   |
|                        | Staff support                 | 0.00                   | 0.00        | 3                   |
|                        | Juices availability           | 0.00                   | 0.01        | 3                   |
|                        | Water availability            | 0.00                   | 0.00        | 2                   |
|                        | Interest in food              | 0.00                   | 0.00        | 2                   |
|                        | Sweet drinks availability     | 0.00                   | 0.00        | 2                   |
|                        | Eating when upset             | 0.00                   | 0.00        | 1                   |
|                        | Children self service         | 0.00                   | 0.00        | 1                   |
|                        | CC attendance                 | 0.00                   | 0.00        | 1                   |
|                        | Vegetables availability       | 0.00                   | 0.00        | 1                   |
|                        | Written PA policy             | 0.00                   | 0.00        | 1                   |
|                        | PA indoor space               | 0.00                   | 0.00        | 1                   |
|                        | Fruits availability           | 0.00                   | 0.00        | 0                   |
|                        | Mobile equipment              | 0.00                   | 0.00        | 0                   |
|                        | Using food as regulator       | 0.00                   | 0.00        | 0                   |
|                        | CC SES                        | 0.00                   | 0.00        | 0                   |
|                        | CC rural urban                | 0.00                   | 0.00        | 0                   |
|                        | Staff PA training             | 0.00                   | 0.00        | 0                   |
|                        | PA outdoor space              | 0.00                   | 0.00        | 0                   |
|                        | Child-initiated interaction   | 0.00                   | 0.00        | 0                   |
| Daily PA               | 0.00                          | 0.00                   | 0           |                     |
| Staff PA participation | 0.00                          | 0.00                   | 0           |                     |
| Fixed PA equipment     | 0.00                          | 0.00                   | 0           |                     |
| Parents PA involvement | 0.00                          | 0.00                   | 0           |                     |
| Skinfold thickness     | <b>Sex*</b>                   | <b>0.26</b>            | <b>0.01</b> | <b>50</b>           |
|                        | Age                           | -0.07                  | 0.01        | 50                  |
|                        | Staff support                 | -0.05                  | 0.03        | 50                  |
|                        | CC rural urban                | -0.05                  | 0.03        | 48                  |

|                                 |              |             |           |
|---------------------------------|--------------|-------------|-----------|
| <b>Parental PA involvement*</b> | <b>-0.03</b> | <b>0.04</b> | <b>35</b> |
| CC SES                          | 0.02         | 0.02        | 32        |
| Written PA policy               | 0.02         | 0.03        | 26        |
| Staff PA training               | 0.02         | 0.03        | 26        |
| Vegetables availability         | -0.01        | 0.02        | 26        |
| Staff nutrition training        | 0.01         | 0.01        | 21        |
| Staff PA participation          | -0.01        | 0.02        | 19        |
| CC attendance                   | 0.01         | 0.01        | 16        |
| Mobile equipment                | -0.01        | 0.02        | 14        |
| Sociocultural region            | -0.01        | 0.02        | 13        |
| Staff food encouragement        | 0.01         | 0.02        | 12        |
| Juices availability             | -0.01        | 0.02        | 8         |
| Children self service           | 0.00         | 0.01        | 15        |
| PA outdoor space                | 0.00         | 0.01        | 12        |
| Child-initiated interaction     | 0.00         | 0.01        | 10        |
| Eating when upset               | 0.00         | 0.01        | 9         |
| PA indoor space                 | 0.00         | 0.01        | 9         |
| Leaving food on the plate       | 0.00         | 0.01        | 9         |
| Using food as regulator         | 0.00         | 0.01        | 9         |
| CC surface                      | 0.00         | 0.01        | 5         |
| Fixed PA equipment              | 0.00         | 0.01        | 5         |
| Water availability              | 0.00         | 0.01        | 4         |
| Sweet drinks availability       | 0.00         | 0.01        | 4         |
| Fruits availability             | 0.00         | 0.00        | 4         |
| Using food as reward            | 0.00         | 0.01        | 3         |
| Interest in food                | 0.00         | 0.01        | 3         |
| Clean plate                     | 0.00         | 0.01        | 3         |
| Playing peers                   | 0.00         | 0.00        | 2         |
| Mixing ages within a CC group   | 0.00         | 0.00        | 1         |
| Daily structured PA             | 0.00         | 0.00        | 1         |
| Daily PA                        | 0.00         | 0.00        | 1         |

PA= physical activity; SD= standard error; CC= childcare.

\* Significant in the regression model.

All outcomes and predictors are standardized. The model always included age and sex.
